# Supplementary material
Source: publisher figshare collection journal article supplement (https://sage.figshare.com/ndownloader/files/17291690)
Supplement: Supplementary file 1 [file 17291690]

**WEB APPENDIX**

**When Words Sweat: Identifying Signals for Loan Default in the Text of Loan Applications**

**Table of Contents**

[1. Additional Information about our Analyses 53](#_Toc464726)

[A. Procedure for coding the profile pictures 53](#_Toc464727)

[B. Random Forest and Extra Trees 53](#_Toc464728)

[C. L1 regularization regression - predictive results 54](#_Toc464729)

[D. Latent Dirichlet allocation (LDA) - predictive results 55](#_Toc464730)

[E. Linguistic Inquiry and Word Count (LIWC) - predictive results 55](#_Toc464731)

[2. Additional Tables and Figures 56](#_Toc464732)

[Table A1: Correspondence between Prosper’s credit grades and FICO scores 56](#_Toc464733)

[Table A2: Distribution of credit grades in our sample and in the population 56](#_Toc464734)

[Table A3: Area under the curve (AUC) for different models and different values credit grade and word frequency 57](#_Toc464735)

[Table A4: Confusion matrix for loan funding versus loans recommended for funding based on our model 58](#_Toc464736)

[Table A5: L1 regularization binary logistic regression (1 = repayment). 59](#_Toc464737)

[Table A6a: Bi-grams that appeared frequently in repaid loans 67](#_Toc464738)

[Table A6b: Bi-grams that appeared more frequently in defaulted loans 70](#_Toc464739)

[Table A7: Top 120 variables with the highest importance in the Random Forest 73](#_Toc464740)

[Table A8: Summary statistics of dataset of all loan requests (n = 122,479) 74](#_Toc464741)

[Table A9a: Bi-grams that appeared frequently in funded loans 75](#_Toc464742)

[Table A9b: Bi-grams that appeared frequently in unfunded loans 79](#_Toc464743)

[Table A10: lists of words with the highest relevance measure for each LDA topic 82](#_Toc464744)

[Figure A1: Distribution of default likelihood for funded and rejected loans 84](#_Toc464745)

[Figure A2: LDA analysis – selecting the number of topics based on perplexity 84](#_Toc464746)

# Additional Information about our Analyses

## **Procedure for coding the profile pictures**

About a third of the borrowers’ profiles in our data (6,078 profiles) included at least one picture that is not a stock photo, however many pictures were not of the borrower, or included more than one person. To identify the borrower in the picture we manually coded the borrower’s profile pictures, using the following process. If the picture included captions, we relied on it to identify the borrower (for example, “My lovely wife and I”). If the picture did not include captions and there was one adult in the picture, we assumed the adult in the picture was the borrower (following the procedure in Pope and Sydnor 2011). Once borrowers were identified, we recorded their gender (Female, Male, “Cannot Tell”), age (in three brackets: Young, Middle-aged, Old), and race (Caucasian, African American, Asian, Hispanic, or “Cannot Tell”). If the picture included more than one adult and there were no captions or if the picture did not include any adult (e.g., the picture included kids, pets, or a kitchen project) we could not identify the borrower and therefore defined the gender and race of that picture as “cannot tell”. We augmented the age in unidentified pictures with the average age of the identified pictures with the three ages categories coded as 1, 2 and 3, respectively.

Each picture was evaluated by at least two different undergraduate student coders, who were unaware of the research objective. Cohen Kappas suggest fairly high levels of agreement across coders, gender = 0.89, race = 0.67, and age = 0.44.[[1]](#footnote-1) Disagreements were resolved by an additional coder who served as the final judge, observing the rating of the previous coders.

We note that based on the Equal Credit Opportunity Act (ECOA) and the Fair Housing Act (FHA) borrowers are not allowed to use race, age and gender to grant loans, however, because we have no way of ensuring that lenders indeed ignored these aspects, we include them in our model.

## **Random Forest and Extra Trees**

Random Forest and Extremely Randomized Trees (Extra Trees) are ensemble of trees. The idea behind both models is to combine a large number of decision trees. In these models, trees are chosen to resolve misclassification of previously included trees. The Random Forest randomly draws with replacements subsets of the calibration data to fit each tree, and a random subset of features (variables) is used in each tree. In the Variance Selection Random Forest features are chosen based on a variance threshold determined by cross validation. The idea behind variance selection threshold is to remove features that do not meet certain threshold. By definition, features that have zero variance (same value in all samples) are removed (for further details see <http://scikit-learn.org/stable/modules/feature_selection.html#variance-threshold)>. We tested the variance in the range of 0.001-0.0650 by increments of 0.00025. We find the variance to be in the range of 0.00175-0.00375 across folds.

In the Best Feature Selection Random Forest features are selected based on a test. That is, we select the K-features with the highest score (other approaches include F-values or mutual information criteria. For further details see http://scikit-learn.org/stable/modules/generated/sklearn.feature_selection.SelectKBest.html#sklearn.feature_selection.SelectKBest). We use cross-validation to determine the “optimal” value of K. We allowed K to vary between a minimum of 10 features and a maximum of half of the training features (over 500 features in our case), by increment of 50 features. We find the number of feature to be in the range of 60-260 across folds.

The Extra Trees is an extension of the Random Forest in which the cut-off point (the split) for each feature in the tree are also chosen at random (from a uniform distribution) and the best split among them is chosen (for further details see http://scikit-learn.org/stable/modules/generated/sklearn.tree.ExtraTreeClassifier.html). We use the maximal and minimal value of each feature observed in the data to select the boundaries of the uninform distribution for each feature. See Due to the size of the feature space, we first apply a K-Best Feature Selection, as described above, to select the features to be included in the Extra Trees. We find the number of features to be in the range of 60-460 across folds.

For all tree-based methods, to limit over-fitting of the trees, we randomized the parameter optimization (Bergstra and Bengio 2012) using a 3-fold cross validation on the calibration data to determine the structure of the tree (e.g., number leaves, number of splits, depth of the tree, and criteria). We use a randomized parameter optimization rather an exhaustive search (or a grid search) due to the large number of variables in our model. The parameters are sampled from a distribution (uniform) over all possible parameter values. We set the ranges for the parameters that dictate the structure of the trees as follows:

- Number of leaves [1-11]
- Depth of the tree [3 - max number of features]
- Minimum sample split [2-11]
- Min sample leaf [1-11]
- Criteria for splits [Gini or Entropy]

Reference

Bergstra, James, and Yoshua Bengio (2012), "Random Search for Hyper-Parameter Optimization." *Journal of Machine Learning Research*, 13 (Feb), 281-305.

## **L1 regularization regression - predictive results**

To test whether the naïve Bayes findings are sensitive to the inclusion of demographics and financial information and the interdependence among words we employ a logistic regression with an L1 penalization with same 1,052 bi-grams used in the ensemble learning and naïve Bayes analysis as well as the demographic and financial information. This analysis, while less easily interpretable than the naïve Bayes, provided very similar qualitative results (see Tables A5 and A6). The correlation between the results of the naïve Bayes and the L1 regression is 0.582 (P-value < 0.01). The L1 regression results confirm that the writing styles and intentions we identified through the naïve Bayes analysis are not merely a proxy of the demographic and financial information.

## **Latent Dirichlet allocation (LDA) - predictive results**

Although the purpose of the LDA analysis was to learn about the topics discussed in loan requests rather than to predict default, we nevertheless tested the predictive ability of the uncovered topics. We find that the model that includes the LDA topics fits the data better than a model that does not include the textual information in terms of the Akaike information criterion (AICLDA = 22,242 and AICnotext = 22,443). Furthermore, the likelihood ratio test significantly supports the model with the textual information relative to the model without the textual information (LRDF=12 = 222.95, p < 0.001). We ran a 10-fold cross validation similar to the one conducted for the ensemble learning model. We find that the model with the LDA topics and the other textual variables (e.g., number of characters in the loan request) predicts defaults better than a baseline model that includes all the financial and demographic information but no textual information (AUCLDA = 70.82% vs. AUCnoLDA = 70.1%). The model with the LDA variables provided higher AUC relative to the model without the textual information in all 10 folds.

## **Linguistic Inquiry and Word Count (LIWC) - predictive results**

We find that the model that includes the LIWC dictionaries fits the data better than a model that does not include the textual information in terms of the Akaike information criterion (AICtext = 22,250 and AICnotext = 22,443), and the likelihood ratio test (LRDF=69 = 331.54, *p* < 0.001). To test for the predictive ability of this model we ran a 10-fold cross validation similar to the one conducted for the ensemble learning model. We find that the model with LIWC predicts defaults better than a baseline model that includes all the financial and demographic information but no textual information in all 10-folds (average AUCLIWC = 70.9% vs. AUCnoLIWC = 70.1%).

# Additional Tables and Figures

## **Table A1: Correspondence between Prosper’s credit grades and FICO scores**

| Grade | AA | A | B | C | D | E | HR |
| --- | --- | --- | --- | --- | --- | --- | --- |
| Score | 760+ | 720-759 | 680-719 | 640-679 | 600-639 | 560-599 | 520-559 |

## **Table A2: Distribution of credit grades in our sample and in the population**

| FICO Score | | Prosper Credit Grade | | Borrowers whose loans were funded | | Distribution in the US population (Source: FICO.com) | |
| --- | --- | --- | --- | --- | --- | --- | --- |
|  |  | |  | |  | |
| 520-559 | HR | | 8.1% | | 7.5% | |
| 560-599 | E | | 8.4% | | 8.3% | |
| 600-639 | D | | 18.2% | | 8.8% | |
| 640-679 | C | | 21.5% | | 10.5% | |
| 680-719 | B | | 17.4% | | 12.3% | |
| 720-759 | A | | 13.4% | | 14.7% | |
| 760+ | AA | | 13.1% | | 37.3% | |
| Sum |  | | 100% | | 100% | |

## **Table A3: Area under the curve (AUC) for different models and different values credit grade and word frequency**

The following is the AUC for each the five models in the ensemble with text only, financial and demographics information only, and a combination of both, for different slices of the data

|  | (1)  Text only | (2)  Financial/ demo | (3)  Text & financial/demo |
| --- | --- | --- | --- |
| AUC of the underlying models of the ensemble  Low Credit Grade (HR, E, D) |  |  |  |
| Logistic L1 | 60.85% | 60.90% | 63.92% |
| Logistic L2 | 61.61% | 58.63% | 64.39% |
| Random Forest (Variance Selection) | 59.65% | 61.58% | 65.21% |
| Random Forest (Best Features Selection) | 60.42% | 61.45% | 63.96% |
| Extremely Randomized Trees (Extra Trees) | 60.51% | 61.87% | 64.52% |
| Medium Credit Grade (B,C) |  |  |  |
| Logistic L1 | 61.76% | 65.50% | 67.04% |
| Logistic L2 | 62.92% | 63.65% | 67.65% |
| Random Forest (Variance Selection) | 59.81% | 65.21% | 65.87% |
| Random Forest (Best Features Selection) | 60.93% | 63.95% | 66.46% |
| Extremely Randomized Trees (Extra Trees) | 60.58% | 64.52% | 66.33% |
| High Credit Grade (AA, A) |  |  |  |
| Logistic L1 | 71.02% | 75.89% | 77.90% |
| Logistic L2 | 72.04% | 74.16% | 77.81% |
| Random Forest (Variance Selection) | 66.69% | 77.14% | 77.32% |
| Random Forest (Best Features Selection) | 68.96% | 75.65% | 77.71% |
| Extremely Randomized Trees (Extra Trees) | 69.45% | 76.41% | 76.86% |
| AUC of the underlying models of the ensemble  Infrequent Words (Bottom 500 words) |  |  |  |
| Logistic L1 | 65.39% | 70.09% | 70.40% |
| Logistic L2 | 66.07% | 68.54% | 70.79% |
| Random Forest (Variance Selection) | 64.03% | 70.22% | 70.75% |
| Random Forest (Best Features Selection) | 63.11% | 69.32% | 71.09% |
| Extremely Randomized Trees (Extra Trees) | 64.91% | 69.62% | 70.52% |
| Frequent Words (Top 552 words) |  |  |  |
| Logistic L1 | 67.39% | 70.09% | 71.66% |
| Logistic L2 | 67.47% | 68.54% | 71.94% |
| Random Forest (Variance Selection) | 64.33% | 70.24% | 70.83% |
| Random Forest (Best Features Selection) | 65.98% | 69.30% | 71.43% |
| Extremely Randomized Trees (Extra Trees) | 66.39% | 69.84% | 70.95% |

Notes: all AUCs are averaged across 10-folds.

## **Table A4: Confusion matrix for loan funding versus loans recommended for funding based on our model**

In the following table we compare actual loan funding with recommended loan funding based expected profits

|  | Recommend based on expected profits | |  |
| --- | --- | --- | --- |
| Actual | Funded | Not Funded | Overall |
| Funded | 11,795 | 7,651 | 19,446 |
| Not Funded | 21,631 | 81,402 | 103,033 |
| Overall | 33,426 | 89,053 | 122,479 |

## **Table A5: L1 regularization binary logistic regression (1 = repayment).**

**Results for variables with β ≠ 0**

| **Variable** | **Beta** | **Variable** | **Beta** | **Variable** | **Beta** |
| --- | --- | --- | --- | --- | --- |
| Amount Requested(x 1000) | -0.06451 | year ago | 1.7324 | Big | 1.0329 |
| Credit Grade HR | -0.7062 | health | 1.7194 | incom ratio | 0.9883 |
| Credit Grade E | -0.3598 | side | 1.7042 | Purchas | 0.9863 |
| Credit Grade D | -0.2897 | prosper lender | 1.6078 | car insur | 0.9748 |
| Credit Grade C | -0.1395 | com | 1.5438 | Electr | 0.9721 |
| Credit Grade A | 0.7631 | borrow | 1.5159 | off the | 0.9671 |
| Credit Grade AA | 0.2699 | few month | 1.4526 | Minimum | 0.9628 |
| Group membership | -0.1045 | than | 1.4252 | pay for | 0.9581 |
| Debt to income missing | -0.2461 | and plan | 1.3999 | Almost | 0.9552 |
| Debt to income ratio | -0.0820 | pay thi | 1.3827 | Active | 0.9508 |
| Images | 0.0058 | card debt | 1.3793 | that can | 0.9348 |
| Is vbrrower homeowner | -0.3090 | lend | 1.3540 | payment and | 0.9265 |
| Lender rate | -5.4153 | bonu | 1.3176 | the other | 0.9238 |
| New England | 0.0973 | dure | 1.2785 | Earli | 0.9157 |
| Middle East | 0.2923 | and our | 1.2750 | Larg | 0.9094 |
| Great Lakes | 0.0734 | unfortun | 1.2689 | and had | 0.9055 |
| Plains Regions | 0.0640 | again for | 1.2634 | Consult | 0.8845 |
| South West | 0.0423 | student loan | 1.2252 | Creat | 0.8762 |
| Rocky Mountain | 0.2861 | step | 1.2135 | Understand | 0.8751 |
| Far West | 0.0577 | reflect | 1.1965 | thi debt | 0.8678 |
| Military | 1.3459 | card with | 1.1906 | and current | 0.8629 |
| # number of words in description | -0.0012 | goe | 1.1866 | Coupl | 0.8593 |
| Spelling mistakes | -0.0030 | wed | 1.1769 | Contribut | 0.8419 |
| SMOG | 0.0253 | graduat | 1.1619 | improv credit | 0.8199 |
| % Greater than or equal to 6 | -0.6424 | loan payment | 1.1421 | the debt | 0.8132 |
| Gender male | 0.0836 | your | 1.1342 | Run | 0.8053 |
| Gender female | -0.0204 | save | 1.1315 | they are | 0.8042 |
| Age | -0.2002 | off thi | 1.1286 | and are | 0.7835 |
| Race white | 0.1270 | averag | 1.1247 | job with | 0.7802 |
| Race african American | -0.2140 | and get | 1.1161 | decid | 0.7780 |
| Race asian | 0.4386 | fall | 1.1070 | colleg | 0.7655 |
| **Variable** | **Beta** | **Variable** | **Beta** | **Variable** | **Beta** |
| Race hispanics | 0.0000 | car payment | 1.1004 | good job | 0.7631 |
| priorListings | 0.0030 | grow | 1.0937 | along | 0.7628 |
| # of words in title | -0.0031 | ani question | 1.0858 | cover the | 0.7620 |
| the balanc | 2.0717 | anoth | 1.0821 | past year | 0.7609 |
| august | 2.0360 | the cost | 1.0624 | owner | 0.7528 |
| invest | 1.8714 | the credit | 1.0577 | while | 0.7504 |
| reinvest | 1.8078 | but the | 1.0485 | even | 0.7469 |
| lower interest | 1.7650 | last year | 1.0333 | detail | 0.7462 |
| last | 0.7447 | futur | 0.5782 | budget | 0.4155 |
| payment for | 0.7393 | payment thi | 0.5764 | prior | 0.3967 |
| appli | 0.7384 | avail | 0.5756 | everi month | 0.3964 |
| the first | 0.7382 | share | 0.5679 | togeth | 0.3922 |
| risk | 0.7353 | rental | 0.5674 | rebuild | 0.3881 |
| ever | 0.7304 | have great | 0.5644 | there | 0.3880 |
| quickli | 0.7143 | return | 0.5644 | learn | 0.3860 |
| the payment | 0.7100 | have two | 0.5634 | through | 0.3846 |
| but have | 0.7082 | car loan | 0.5633 | max | 0.3817 |
| bank | 0.7080 | your consider | 0.5541 | experi | 0.3726 |
| student | 0.7050 | water | 0.5479 | have steadi | 0.3722 |
| over the | 0.6975 | stabl | 0.5455 | should | 0.3711 |
| although | 0.6910 | realiz | 0.5381 | for over | 0.3632 |
| you will | 0.6867 | least | 0.5204 | loan that | 0.3581 |
| low | 0.6832 | teach | 0.5118 | work the | 0.3573 |
| mistak | 0.6831 | sinc | 0.5083 | posit | 0.3558 |
| tax | 0.6820 | each | 0.5075 | reliabl | 0.3506 |
| though | 0.6747 | see | 0.5046 | process | 0.3477 |
| problem | 0.6623 | salari | 0.4944 | solid | 0.3475 |
| thank for | 0.6600 | never | 0.4927 | major | 0.3456 |
| longer | 0.6597 | turn | 0.4885 | happen | 0.3337 |
| order | 0.6573 | inform | 0.4857 | year monthli | 0.3267 |
| part | 0.6523 | off with | 0.4800 | have not | 0.3217 |
| debt free | 0.6449 | with prosper | 0.4765 | collect | 0.3140 |
| teacher | 0.6409 | loan from | 0.4739 | the bank | 0.3130 |
| **Variable** | **Beta** | **Variable** | **Beta** | **Variable** | **Beta** |
| the minimum | 0.6408 | elimin | 0.4730 | year now | 0.3120 |
| the high | 0.6357 | mean | 0.4693 | cover | 0.3115 |
| earn | 0.6341 | make payment | 0.4657 | expect | 0.3067 |
| use credit | 0.6325 | excel credit | 0.4655 | than the | 0.3064 |
| financ | 0.6290 | our credit | 0.4652 | life | 0.3045 |
| get out | 0.6263 | manag | 0.4522 | interest credit | 0.3039 |
| month have | 0.6250 | way | 0.4485 | close | 0.3023 |
| everi | 0.6234 | those | 0.4478 | interest rate | 0.2997 |
| could | 0.6221 | free | 0.4401 | both | 0.2988 |
| abov | 0.6168 | account | 0.4262 | june | 0.2985 |
| year have | 0.6038 | did not | 0.4260 | myself | 0.2813 |
| been pay | 0.6021 | time have | 0.4211 | the process | 0.2808 |
| rather | 0.5915 | file | 0.4209 | comput | 0.2776 |
| too | 0.5823 | travel | 0.4205 | own home | 0.2762 |
| prosper and | 0.5823 | credit score | 0.4196 | husband and | 0.2739 |
| less | 0.5802 | car and | 0.4161 | summer | 0.2721 |
| sure | 0.2693 | schedul | 0.1596 | can see | 0.0362 |
| ga | 0.2688 | system | 0.1546 | provid | 0.0356 |
| point | 0.2683 | payoff | 0.1532 | annual | 0.0343 |
| into | 0.2680 | entir | 0.1530 | cost | 0.0336 |
| clear | 0.2652 | made | 0.1482 | remain | 0.0314 |
| under | 0.2637 | into one | 0.1472 | have veri | 0.0296 |
| singl | 0.2596 | bankruptci | 0.1458 | the busi | 0.0282 |
| toward | 0.2536 | instead | 0.1414 | howev | 0.0266 |
| final | 0.2525 | marri | 0.1414 | until | 0.0255 |
| misc | 0.2522 | help with | 0.1410 | set | 0.0231 |
| cours | 0.2495 | littl | 0.1355 | build | 0.0224 |
| recent | 0.2477 | and not | 0.1273 | career | 0.0214 |
| engin | 0.2470 | success | 0.1230 | off credit | 0.0205 |
| paid for | 0.2396 | it | 0.1229 | current employ | 0.0167 |
| addit | 0.2338 | given | 0.1190 | profil | 0.0138 |
| fee | 0.2335 | half | 0.1175 | compani and | 0.0096 |
| been with | 0.2305 | note | 0.1092 | firm | 0.0090 |
| **Variable** | **Beta** | **Variable** | **Beta** | **Variable** | **Beta** |
| and they | 0.2291 | fund | 0.1087 | replac | 0.0067 |
| next year | 0.2275 | consid | 0.1052 | the past | 0.0029 |
| default | 0.2261 | profession | 0.1012 | been employ | 0.0017 |
| continu | 0.2191 | promot | 0.1003 | real | -0.0011 |
| balanc | 0.2165 | small | 0.0931 | total | -0.0043 |
| five | 0.2140 | time for | 0.0923 | gross | -0.0128 |
| improv | 0.2062 | appreci | 0.0900 | school and | -0.0133 |
| delinqu | 0.2048 | cash flow | 0.0888 | cell phone | -0.0141 |
| still | 0.2009 | miss payment | 0.0885 | state | -0.0150 |
| well | 0.1978 | would like | 0.0874 | wait | -0.0175 |
| except | 0.1972 | chang | 0.0801 | leas | -0.0179 |
| truck | 0.1942 | live | 0.0790 | work and | -0.0202 |
| debt that | 0.1899 | look | 0.0779 | the purpos | -0.0217 |
| paid off | 0.1899 | establish | 0.0774 | school | -0.0226 |
| guarante | 0.1880 | degre | 0.0759 | and for | -0.0239 |
| loan thank | 0.1836 | becaus have | 0.0742 | wife and | -0.0241 |
| anyth | 0.1833 | extra | 0.0692 | came | -0.0296 |
| thi will | 0.1792 | fix | 0.0619 | get the | -0.0301 |
| incur | 0.1673 | off and | 0.0594 | leav | -0.0357 |
| extrem | 0.1668 | self | 0.0569 | wa not | -0.0375 |
| retir | 0.1656 | after | 0.0557 | record | -0.0378 |
| offer | 0.1609 | ad | 0.0530 | most | -0.0387 |
| payment the | 0.1597 | help get | 0.0418 | that ha | -0.0397 |
| for our | -0.0405 | plu | -0.1432 | quit | -0.2260 |
| and credit | -0.0411 | rent | -0.1436 | loan which | -0.2304 |
| univers | -0.0432 | thing | -0.1446 | father | -0.2332 |
| open | -0.0445 | increas | -0.1450 | higher | -0.2354 |
| that wa | -0.0461 | will also | -0.1484 | level | -0.2397 |
| found | -0.0484 | and hope | -0.1491 | higher interest | -0.2468 |
| high interest | -0.0486 | also have | -0.1508 | perfect | -0.2470 |
| ask for | -0.0492 | book | -0.1554 | histori | -0.2522 |
| normal | -0.0546 | equip | -0.1570 | own | -0.2539 |
| bought | -0.0555 | loan becausei | -0.1583 | finish | -0.2613 |
| **Variable** | **Beta** | **Variable** | **Beta** | **Variable** | **Beta** |
| seek | -0.0562 | year old | -0.1683 | area | -0.2626 |
| past | -0.0574 | new | -0.1756 | the end | -0.2644 |
| credit rate | -0.0647 | wife | -0.1771 | relist | -0.2657 |
| credit report | -0.0667 | work with | -0.1782 | and the | -0.2664 |
| and can | -0.0681 | pleas | -0.1806 | veri respons | -0.2688 |
| deposit | -0.0709 | may | -0.1823 | the time | -0.2724 |
| work for | -0.0720 | use the | -0.1828 | day | -0.2770 |
| respons | -0.0741 | not have | -0.1832 | will make | -0.2801 |
| and that | -0.0792 | clean | -0.1835 | alway | -0.2850 |
| score and | -0.0848 | age | -0.1843 | save and | -0.2853 |
| plan | -0.0874 | stand | -0.1889 | credit and | -0.2865 |
| for take | -0.0874 | two year | -0.1889 | love | -0.2876 |
| individu | -0.0881 | home and | -0.1905 | mine | -0.2883 |
| licens | -0.0934 | the interest | -0.1931 | repair | -0.2894 |
| due | -0.0978 | find | -0.1963 | loan have | -0.2908 |
| that have | -0.1032 | yr | -0.1983 | year with | -0.2958 |
| live with | -0.1037 | budget mortgag | -0.1984 | the loan | -0.2981 |
| onc | -0.1058 | compani | -0.2020 | know | -0.2982 |
| grade | -0.1098 | mother | -0.2027 | obtain | -0.2989 |
| profit | -0.1142 | commun | -0.2029 | dont | -0.3097 |
| commit | -0.1150 | etc | -0.2040 | develop | -0.3111 |
| you for | -0.1168 | use for | -0.2061 | and just | -0.3120 |
| done | -0.1180 | can pay | -0.2072 | veri hard | -0.3152 |
| need thi | -0.1235 | much | -0.2144 | and will | -0.3174 |
| keep | -0.1289 | off all | -0.2148 | the same | -0.3217 |
| oblig | -0.1323 | do | -0.2161 | attend | -0.3222 |
| loan would | -0.1326 | the money | -0.2185 | room | -0.3255 |
| sold | -0.1353 | per month | -0.2204 | abl | -0.3309 |
| use thi | -0.1377 | product | -0.2236 | you are | -0.3351 |
| month monthli | -0.1427 | have good | -0.2252 | month for | -0.3354 |
| pay back | -0.3402 | rate and | -0.4552 | citi | -0.6057 |
| pleas help | -0.3430 | save for | -0.4561 | assist | -0.6076 |
| **Variable** | **Beta** | **Variable** | **Beta** | **Variable** | **Beta** |
| becaus the | -0.3509 | receiv | -0.4622 | thi prosper | -0.6096 |
| for loan | -0.3519 | request | -0.4636 | call | -0.6196 |
| dream | -0.3540 | be | -0.4642 | and help | -0.6275 |
| loan pay | -0.3568 | prioriti | -0.4695 | between | -0.6293 |
| and need | -0.3604 | expand | -0.4734 | dollar | -0.6305 |
| deduct | -0.3608 | prosper loan | -0.4745 | mani | -0.6305 |
| consolid | -0.3746 | will pay | -0.4755 | their | -0.6320 |
| support | -0.3751 | per | -0.4758 | item | -0.6447 |
| list and | -0.3854 | these | -0.4785 | then | -0.6488 |
| surgeri | -0.3872 | line | -0.4826 | around | -0.6524 |
| time job | -0.3918 | charg | -0.4863 | medic | -0.6612 |
| debt and | -0.3936 | are not | -0.4870 | have alway | -0.6634 |
| husband | -0.4036 | properti | -0.4951 | come | -0.6700 |
| what you | -0.4074 | mortgag | -0.5004 | explain | -0.6767 |
| thi time | -0.4078 | within the | -0.5077 | capit | -0.6855 |
| expens car | -0.4121 | stress | -0.5216 | everyth | -0.6911 |
| give | -0.4123 | stabl job | -0.5249 | drive | -0.6911 |
| the next | -0.4171 | report | -0.5270 | have work | -0.6929 |
| care | -0.4181 | incom and | -0.5276 | interest loan | -0.6980 |
| repay thi | -0.4185 | loan with | -0.5303 | sever | -0.7000 |
| from the | -0.4195 | field | -0.5341 | left over | -0.7007 |
| look for | -0.4228 | score | -0.5367 | locat | -0.7025 |
| afford | -0.4229 | for and | -0.5378 | she | -0.7078 |
| ago and | -0.4243 | which will | -0.5393 | ani | -0.7148 |
| time monthli | -0.4287 | the compani | -0.5405 | where | -0.7192 |
| juli | -0.4345 | worker | -0.5456 | famili | -0.7302 |
| child | -0.4383 | answer | -0.5473 | that need | -0.7326 |
| and would | -0.4389 | abil | -0.5525 | advanc | -0.7347 |
| help pay | -0.4391 | educ | -0.5628 | doe | -0.7356 |
| date | -0.4402 | tri | -0.5701 | off high | -0.7390 |
| card that | -0.4445 | seem | -0.5726 | the fund | -0.7458 |
| for almost | -0.4450 | thi year | -0.5766 | late | -0.7624 |
| dti | -0.4452 | make the | -0.5767 | behind | -0.7648 |
| **Variable** | **Beta** | **Variable** | **Beta** | **Variable** | **Beta** |
| www | -0.4460 | were | -0.5780 | taken | -0.7650 |
| store | -0.4469 | equiti | -0.5821 | difficult | -0.7653 |
| three | -0.4543 | monthli payment | -0.5947 | forward | -0.7749 |
| payment other | -0.4550 | kid | -0.6002 | valu | -0.7763 |
| just need | -0.7777 | long | -0.8919 | websit | -1.1693 |
| off some | -0.7845 | need the | -0.9440 | promis | -1.1840 |
| sourc | -0.7865 | busi | -0.9504 | took | -1.1876 |
| loan and | -0.8118 | them | -1.0029 | and veri | -1.1896 |
| someon | -0.8248 | refin | -1.0072 | industri | -1.2068 |
| becausei | -0.8277 | bit | -1.0113 | maintain | -1.2239 |
| back thi | -0.8384 | monthli incom | -1.0238 | person | -1.2278 |
| loan off | -0.8463 | sale | -1.0447 | daughter | -1.2799 |
| again | -0.8499 | bill and | -1.0486 | fact | -1.3150 |
| they | -0.8550 | bid | -1.0486 | get back | -1.3578 |
| total monthli | -0.8579 | project | -1.0511 | gener | -1.3681 |
| price | -0.8587 | been the | -1.0655 | follow | -1.3771 |
| divorc | -0.8600 | payday loan | -1.0711 | son | -1.4448 |
| verifi | -0.8632 | hard | -1.0984 | god | -1.7250 |
| with the | -0.8642 | will have | -1.1039 | estat | -2.0248 |
| the year | -0.8777 | the opportun | -1.1084 | lost | -2.1825 |
| need help | -0.8899 | local | -1.1657 | thank you | -2.3893 |
|  |  |  |  | Intercept | 1.9471 |

The table above reports the variables in the L1 regularized regression that were not set to zero. Below we list the variables that were set to zero.

Note, that while one can use bootstrap approach to obtain standard errors for the L1 regularization binary logistic regression parameter estimates, because the parameters of the L1 regularization model are biased, standard errors in a regularized regression are not meaningful (Park and Casella 2008). Accordingly, we do not report standard errors in the Table A5.

**Variables with β = 0:**

**Bi-grams (listed here alphabetically):**

abl pay, about month, about year, account and, actual, add, after tax, ago, ahead, all bill, all credit, all debt, all our, all the, allow, almost year, alreadi, alway paid, alway pay, america, amount, and also, and ha, and i'm, and make, and now, and pay, and start, and take, and thank, and then, and thi, and wa, and want, and work, apart, approx, approxim, are good, are paid, ask, auto, automat, away, back the, back track, bad, base, becom, been late, been work, befor, begin, believ, below, benefit, best, better, bill time, bless, bring, busi and, buy, can get, can't, card balanc, card financi, card have, case, cash, catch, caus, cell, chanc, check, child support, children, class, client, combin, compani for, complet, consider, consolid credit, contact, contract, credit histori, current have, current work, custom, cut, deal, debt financi, debt have, debt incom, decis, depend, did, didn't, differ, direct, doe not, don't, don't have, down, down the, due the, dure the, each month, easili, emerg, employ, employ for, employe, end, enjoy, enough, everyon, excel, exist, expens and, expens are, expens for, expens ga, expens total, explain what, explain whi, far, feel, feel free, few, few year, figur, first, flow, for consid, for financi, for month, for pay, for prosper, for view, for year, for your, four, friend, from prosper, full, full time, fulli, further, ga util, get rid, get thi, go, goal, god bless, gone, good credit, got, great, greatli, groceri, group, ha been, happi, hard work, have alreadi, have ani, have credit, have excel, have had, have learn, have made, have never, have one, have over, have paid, have problem, have some, have stabl, have the, hello, help out, her, here, hi, him, hold, honest, hope, hospit, hour, hous and, how, i'd, i'll, i'm, i'm not, i'v, i'v been, immedi, import, includ, incom after, incom from, intend, into the, issu, it', job and, job for, know that, late payment, law, left, lender, less than, lesson, let, like pay, limit, list, loan back, loan consolid, loan credit, loan explain, loan financi, loan for, loan help, loan monthli, loan need, loan request, loan the, lot, lower, market, medic bill, meet, member, minimum payment, miss, mom, money and, money for, money pay, month ago, month and, month that, monthli budget, more than, mortgag rent, move, name, need pay, never been, never miss, next, not includ, not onli, now and, now have, number, off debt, offic, old, one payment, one the, onli, oper, opportun, origin, our, our home, out the, outstand, over year, overtim, owe, paid full, parent, part time, pass, pay all, pay bill, pay down, pay the, pay them, paycheck, payday, payment have, payment prosper, payment time, payment will, peopl, period, person loan, pictur, place, plan pay, possibl, post, present, pretti, previou, program, prosper payment, prosper will, prove, public, purpos thi, put, question, rais, ratio, read, readi, real estat, realli, reason, rebuild credit, reduc, remov, rent insur, repay, requir, rest, result, review, revolv, rid, right, right now, same, say, second, secur, see have, sell, servic, short, show, site, situat explain, situat have, six, some credit, someth, soon, spend, start, stay, steadi, strong, such, take care, take the, term, that are, that the, that thi, that time, that will, that would, that you, the amount, the best, the bill, the follow, the futur, the hous, the last, the monthli, the mortgag, the new, the onli, the prosper, the reason, the remain, the rest, there are, thi money, think, thought, three year, time and, time everi, time the, top, top prioriti, total expens, track, tri get, tuition, two, unexpect, use consolid, use help, use pay, usual, vehicl, veri good, view, view list, want, want pay, week, went, what, when, when wa, whi, whi you, who, wife', will abl, will allow, will help, will not, will paid, with credit, with thi, within, without, won't, wonder, work full, work hard, worth, would have, would use, year and, year the, yet, you can, you have, young, your help, your time

**Financial and demographic variables:**

Bank draft fee Annual rate, Credit Grade B, South East, Gender Unknown, Race Unknown, Race - Hispanics

**Reference**

Park, Trevor and George Casella (2008), “The Bayesian Lasso,” *Journal of the American Statistical Association*, 103 (482), 681-686.

## **Table A6a: Bi-grams that appeared frequently in repaid loans**

p(word|repaid)/p(word|defaulted) ≥ 1.1

| Bi-gram (repaid) | Ratio | Bi-gram (repaid) | Ratio | Bi-gram (repaid) | Ratio |
| --- | --- | --- | --- | --- | --- |
| reinvest | 3.92 | bonu | 1.43 | incur | 1.29 |
| lend | 2.19 | low | 1.41 | mean | 1.29 |
| lower interest | 1.99 | car and | 1.41 | everi month | 1.29 |
| i'd | 1.96 | off thi | 1.41 | earn | 1.29 |
| side | 1.94 | than | 1.40 | pretti | 1.28 |
| excel credit | 1.82 | cover the | 1.40 | and current | 1.28 |
| borrow | 1.80 | earli | 1.39 | been pay | 1.28 |
| wed | 1.80 | miss payment | 1.38 | worth | 1.28 |
| prosper lender | 1.78 | job with | 1.38 | less than | 1.28 |
| student loan | 1.78 | share | 1.38 | debt financi | 1.28 |
| than the | 1.74 | activ | 1.38 | pay for | 1.27 |
| invest | 1.71 | incom ratio | 1.37 | car insur | 1.27 |
| graduat | 1.69 | august | 1.37 | less | 1.26 |
| rather | 1.68 | com | 1.37 | ever | 1.26 |
| student | 1.67 | big | 1.36 | apart | 1.26 |
| card with | 1.66 | own home | 1.36 | default | 1.26 |
| the minimum | 1.64 | interest rate | 1.36 | health | 1.26 |
| the balanc | 1.61 | don't | 1.35 | all bill | 1.26 |
| contribut | 1.59 | usual | 1.34 | instead | 1.26 |
| it' | 1.58 | travel | 1.34 | excel | 1.26 |
| thi debt | 1.56 | i'm | 1.34 | debt have | 1.26 |
| risk | 1.54 | colleg | 1.33 | good credit | 1.26 |
| summer | 1.54 | guarante | 1.33 | miss | 1.25 |
| i'll | 1.53 | like pay | 1.33 | payment for | 1.25 |
| engin | 1.53 | more than | 1.33 | solid | 1.25 |
| card debt | 1.52 | easili | 1.32 | retir | 1.25 |
| and i'm | 1.52 | spend | 1.32 | possibl | 1.25 |
| have excel | 1.52 | use credit | 1.32 | save for | 1.25 |
| the bank | 1.52 | firm | 1.32 | debt free | 1.25 |
| and plan | 1.51 | paid for | 1.31 | understand | 1.25 |
| thank for | 1.50 | figur | 1.31 | but the | 1.25 |
| after tax | 1.50 | expens are | 1.31 | the debt | 1.25 |
| prosper and | 1.50 | didn't | 1.31 | cover | 1.25 |
| i'v been | 1.50 | debt incom | 1.30 | debt that | 1.24 |
| goe | 1.50 | balanc | 1.30 | teach | 1.24 |
| minimum payment | 1.49 | quickli | 1.30 | off credit | 1.24 |
| never miss | 1.48 | return | 1.30 | higher | 1.24 |
| i'v | 1.47 | rate and | 1.30 | and want | 1.24 |
| minimum | 1.46 | the interest | 1.30 | have steadi | 1.24 |
| entir | 1.46 | save | 1.30 | good job | 1.24 |
| the cost | 1.44 | expect | 1.29 | have great | 1.24 |

| Bi-gram (repaid) | Ratio | Bi-gram (repaid) | Ratio | Bi-gram (repaid) | Ratio |
| --- | --- | --- | --- | --- | --- |
| down the | 1.24 | think | 1.20 | law | 1.16 |
| salari | 1.24 | the first | 1.20 | outstand | 1.16 |
| interest credit | 1.24 | book | 1.20 | fix | 1.16 |
| alway pay | 1.24 | case | 1.19 | under | 1.16 |
| have never | 1.24 | decid | 1.19 | ad | 1.16 |
| stabl job | 1.24 | with credit | 1.19 | cost | 1.16 |
| consult | 1.23 | credit histori | 1.19 | annual | 1.16 |
| current have | 1.23 | dure the | 1.19 | coupl | 1.16 |
| lender | 1.23 | cours | 1.19 | site | 1.16 |
| stabl | 1.23 | pay down | 1.19 | ga | 1.16 |
| step | 1.23 | you have | 1.19 | past year | 1.16 |
| card balanc | 1.23 | toward | 1.19 | payment have | 1.16 |
| while | 1.23 | way | 1.19 | appli | 1.16 |
| few month | 1.23 | major | 1.19 | purchas | 1.16 |
| becaus have | 1.22 | ani question | 1.19 | comput | 1.16 |
| the credit | 1.22 | next year | 1.18 | use pay | 1.16 |
| lower | 1.22 | card financi | 1.18 | off debt | 1.15 |
| have veri | 1.22 | plan | 1.18 | car loan | 1.15 |
| payment and | 1.22 | averag | 1.18 | month have | 1.15 |
| pay thi | 1.22 | payment the | 1.18 | question | 1.15 |
| the high | 1.22 | tax | 1.18 | use consolid | 1.15 |
| teacher | 1.22 | term | 1.18 | anyth | 1.15 |
| card have | 1.22 | ga util | 1.18 | longer | 1.15 |
| plan pay | 1.22 | paid full | 1.18 | note | 1.15 |
| situat have | 1.22 | year monthli | 1.17 | the other | 1.15 |
| time for | 1.22 | free | 1.17 | profession | 1.15 |
| too | 1.22 | thought | 1.17 | have two | 1.15 |
| incom after | 1.22 | alreadi | 1.17 | buy | 1.15 |
| promot | 1.22 | three year | 1.17 | current employ | 1.15 |
| except | 1.22 | replac | 1.17 | how | 1.15 |
| though | 1.22 | order | 1.17 | reflect | 1.15 |
| univers | 1.22 | half | 1.17 | requir | 1.15 |
| about month | 1.22 | dure | 1.17 | young | 1.14 |
| have alreadi | 1.21 | ratio | 1.17 | far | 1.14 |
| have good | 1.21 | revolv | 1.17 | through | 1.14 |
| even | 1.21 | credit rate | 1.17 | parent | 1.14 |
| late payment | 1.21 | degre | 1.17 | togeth | 1.14 |
| schedul | 1.21 | the remain | 1.17 | and are | 1.14 |
| least | 1.21 | don't have | 1.17 | extra | 1.14 |
| one the | 1.21 | futur | 1.17 | max | 1.14 |
| higher interest | 1.21 | fall | 1.17 | would like | 1.14 |
| your consider | 1.21 | happi | 1.17 | live | 1.14 |
| expens ga | 1.20 | have credit | 1.17 | thi money | 1.13 |
| below | 1.20 | veri good | 1.17 | paid off | 1.13 |

| Bi-gram (repaid) | Ratio | Bi-gram (repaid) | Ratio | Bi-gram (repaid) | Ratio |
| --- | --- | --- | --- | --- | --- |
| look | 1.13 | post | 1.12 | base | 1.11 |
| loan the | 1.13 | have ani | 1.12 | june | 1.10 |
| histori | 1.13 | are paid | 1.12 | paycheck | 1.10 |
| last year | 1.13 | someth | 1.12 | and pay | 1.10 |
| offer | 1.13 | both | 1.12 | yet | 1.10 |
| bit | 1.13 | part time | 1.11 | although | 1.10 |
| have stabl | 1.13 | class | 1.11 | time have | 1.10 |
| consolid credit | 1.13 | few year | 1.11 | group | 1.10 |
| fulli | 1.13 | loan from | 1.11 | make payment | 1.10 |
| strong | 1.13 | further | 1.11 | full time | 1.10 |
| into one | 1.13 | over the | 1.11 | career | 1.10 |
| addit | 1.13 | reason | 1.11 | work full | 1.10 |
| financ | 1.13 | that can | 1.11 | cash flow | 1.10 |
| off high | 1.13 | charg | 1.11 | money and | 1.10 |
| and would | 1.12 | larg | 1.11 | and hope | 1.10 |
| profil | 1.12 | out the | 1.11 | not includ | 1.10 |
| reliabl | 1.12 | reduc | 1.11 | the last | 1.10 |
| five | 1.12 | should | 1.11 | tuition | 1.10 |
| best | 1.12 | short | 1.11 | limit | 1.10 |
| year ago | 1.12 | intend | 1.11 | the monthli | 1.10 |
| experi | 1.12 | card that | 1.11 | sure | 1.10 |

## **Table A6b: Bi-grams that appeared more frequently in defaulted loans**

p(word|defaulted)/p(word|repaid) ≥ 1.1

| Bi-gram (defaulted) | Ratio | Bi-gram (defaulted) | Ratio | Bi-gram (defaulted) | Ratio |
| --- | --- | --- | --- | --- | --- |
| payday loan | 2.12 | locat | 1.47 | mother | 1.31 |
| payday | 2.06 | real estat | 1.46 | thi prosper | 1.30 |
| god | 2.01 | see have | 1.46 | children | 1.30 |
| god bless | 2.00 | estat | 1.46 | sale | 1.30 |
| view list | 1.99 | daughter | 1.45 | hard | 1.30 |
| need help | 1.85 | are good | 1.44 | child | 1.30 |
| for view | 1.84 | time everi | 1.42 | father | 1.30 |
| top prioriti | 1.84 | caus | 1.42 | have over | 1.30 |
| lost | 1.77 | pleas help | 1.41 | rebuild | 1.30 |
| bless | 1.73 | refin | 1.41 | rebuild credit | 1.30 |
| the follow | 1.69 | project | 1.40 | tri get | 1.29 |
| view | 1.67 | follow | 1.40 | mother | 1.31 |
| prioriti | 1.67 | back thi | 1.40 | thi prosper | 1.30 |
| promis | 1.66 | medic bill | 1.40 | children | 1.30 |
| prosper will | 1.65 | divorc | 1.39 | sale | 1.30 |
| for prosper | 1.65 | you are | 1.39 | hard | 1.30 |
| would use | 1.65 | left over | 1.39 | child | 1.30 |
| payment prosper | 1.63 | just need | 1.39 | father | 1.30 |
| list and | 1.63 | and credit | 1.38 | have over | 1.30 |
| get back | 1.63 | prove | 1.37 | rebuild | 1.30 |
| back track | 1.61 | veri hard | 1.37 | rebuild credit | 1.30 |
| behind | 1.60 | for pay | 1.37 | tri get | 1.29 |
| yr | 1.59 | again | 1.36 | month that | 1.29 |
| stress | 1.58 | call | 1.36 | will abl | 1.29 |
| loan explain | 1.56 | real | 1.35 | know that | 1.29 |
| situat explain | 1.55 | not onli | 1.35 | she | 1.29 |
| son | 1.54 | been the | 1.35 | industri | 1.28 |
| explain what | 1.53 | hello | 1.34 | store | 1.28 |
| help get | 1.52 | worker | 1.33 | automat | 1.28 |
| prosper payment | 1.51 | have learn | 1.33 | off some | 1.27 |
| someon | 1.51 | total monthli | 1.33 | relist | 1.27 |
| what you | 1.50 | expand | 1.33 | local | 1.27 |
| again for | 1.50 | capit | 1.32 | lesson | 1.27 |
| explain whi | 1.50 | top | 1.32 | assist | 1.27 |
| catch | 1.50 | the opportun | 1.31 | surgeri | 1.27 |
| child support | 1.49 | hard work | 1.31 | normal | 1.26 |
| and thank | 1.49 | everyon | 1.31 | equip | 1.26 |
| explain | 1.49 | fact | 1.31 | busi and | 1.26 |
| chanc | 1.49 | thank you | 1.31 | oper | 1.26 |
| whi you | 1.47 | mother | 1.31 | bill and | 1.26 |

| Bi-gram (defaulted) | Ratio | Bi-gram (defaulted) | Ratio | Bi-gram (defaulted) | Ratio |
| --- | --- | --- | --- | --- | --- |
| medic | 1.26 | area | 1.21 | everyth | 1.17 |
| pay back | 1.26 | honest | 1.21 | need the | 1.17 |
| citi | 1.26 | loan pay | 1.21 | taken | 1.17 |
| famili | 1.25 | report | 1.21 | file | 1.17 |
| day | 1.25 | thi time | 1.20 | will have | 1.17 |
| difficult | 1.25 | custom | 1.20 | mistak | 1.17 |
| support | 1.25 | kid | 1.20 | total | 1.17 |
| bad | 1.25 | for financi | 1.20 | the bill | 1.17 |
| name | 1.25 | and wa | 1.20 | payment other | 1.17 |
| item | 1.25 | ha been | 1.20 | prosper loan | 1.16 |
| the busi | 1.25 | repair | 1.20 | person | 1.16 |
| direct | 1.25 | hospit | 1.20 | person loan | 1.16 |
| husband | 1.25 | let | 1.20 | and just | 1.16 |
| advanc | 1.24 | attend | 1.20 | them | 1.16 |
| work hard | 1.24 | pleas | 1.20 | clean | 1.16 |
| year old | 1.24 | hi | 1.20 | and start | 1.16 |
| work with | 1.24 | verifi | 1.19 | interest loan | 1.16 |
| busi | 1.24 | that you | 1.19 | with the | 1.16 |
| mom | 1.24 | the prosper | 1.19 | got | 1.16 |
| took | 1.24 | have alway | 1.19 | sever | 1.16 |
| sourc | 1.24 | and help | 1.19 | mortgag rent | 1.15 |
| for take | 1.24 | monthli budget | 1.19 | her | 1.15 |
| that need | 1.24 | and can | 1.19 | budget mortgag | 1.15 |
| payment will | 1.23 | and need | 1.19 | issu | 1.15 |
| product | 1.23 | greatli | 1.19 | place | 1.15 |
| becaus the | 1.23 | pass | 1.19 | whi | 1.15 |
| ask for | 1.23 | you will | 1.19 | need thi | 1.15 |
| track | 1.23 | opportun | 1.18 | profit | 1.15 |
| you for | 1.23 | all our | 1.18 | present | 1.15 |
| our home | 1.23 | time monthli | 1.18 | open | 1.15 |
| gener | 1.23 | care | 1.18 | the mortgag | 1.15 |
| left | 1.23 | loan request | 1.18 | maintain | 1.14 |
| take care | 1.22 | save and | 1.18 | the compani | 1.14 |
| were | 1.22 | Old | 1.18 | leas | 1.14 |
| develop | 1.22 | licens | 1.18 | due the | 1.14 |
| credit report | 1.22 | the new | 1.18 | year the | 1.14 |
| websit | 1.22 | i'm not | 1.18 | age | 1.14 |
| the fund | 1.22 | contract | 1.18 | request | 1.14 |
| which will | 1.22 | overtim | 1.18 | loan for | 1.14 |
| came | 1.22 | Him | 1.18 | their | 1.14 |

| Bi-gram (defaulted) | Ratio | Bi-gram (defaulted) | Ratio | Bi-gram (defaulted) | Ratio |
| --- | --- | --- | --- | --- | --- |
| loan monthli | 1.14 | properti | 1.12 | help pay | 1.11 |
| List | 1.14 | who | 1.12 | Check | 1.11 |
| can get | 1.14 | the time | 1.12 | and get | 1.11 |
| Mani | 1.14 | properti | 1.12 | Perfect | 1.10 |
| These | 1.14 | Who | 1.12 | have work | 1.10 |
| Know | 1.14 | Where | 1.12 | room | 1.10 |
| Review | 1.13 | Market | 1.12 | client | 1.10 |
| off all | 1.13 | Gone | 1.12 | for year | 1.10 |
| that ha | 1.13 | month for | 1.12 | can see | 1.10 |
| Turn | 1.13 | payment time | 1.12 | give | 1.10 |
| for month | 1.13 | our credit | 1.12 | love | 1.10 |
| total expens | 1.13 | each month | 1.11 | they are | 1.10 |
| What | 1.13 | Juli | 1.11 | mortgag | 1.10 |
| Went | 1.13 | Obtain | 1.11 | doe | 1.10 |
| america | 1.13 | expens total | 1.11 | onc | 1.10 |
| the reason | 1.13 | Readi | 1.11 | self | 1.10 |
| loan and | 1.13 | Answer | 1.11 | date | 1.10 |
| deduct | 1.13 | Owner | 1.11 | deal | 1.10 |
| improv credit | 1.13 | back the | 1.11 | provid | 1.10 |
| wonder | 1.13 | from the | 1.11 | leav | 1.10 |
| begin | 1.13 | that wa | 1.11 | then | 1.10 |
| Due | 1.13 | and that | 1.11 | becausei | 1.10 |
| Our | 1.13 | deposit | 1.11 | loan becausei | 1.10 |
| been with | 1.13 | Remov | 1.11 | abil | 1.10 |
| can't | 1.12 | Found | 1.11 | all debt | 1.10 |
| and ha | 1.12 | that are | 1.11 | oblig | 1.10 |
| loan which | 1.12 | Afford | 1.11 | tri | 1.10 |
| They | 1.12 | and now | 1.11 | servic | 1.10 |
| need pay | 1.12 | Owe | 1.11 | come | 1.10 |
| the time | 1.12 | Mine | 1.11 |  |  |

## **Table A7: Top 120 variables with the highest importance in the Random Forest**

| **Variables** | **Importance** | **Variables** | **Importance** | **Variables** | **Importance** | **Variables** | **Importance** |
| --- | --- | --- | --- | --- | --- | --- | --- |
| Lender rate | 0.056502 | SMOG | 0.003126 | whi you | 0.002529 | look | 0.002311 |
| Credit Grade A | 0.041125 | get back | 0.003051 | abl | 0.002518 | Gender - female | 0.002301 |
| Credit Grade HR | 0.027996 | daughter | 0.003031 | graduat | 0.002515 | total | 0.002292 |
| Amount requested | 0.018964 | our | 0.003023 | never | 0.002509 | low | 0.002280 |
| Credit Grade E | 0.012061 | student loan | 0.003009 | famili | 0.002508 | bill and | 0.002247 |
| Credit Grade AA | 0.010833 | explain what | 0.002992 | will abl | 0.002507 | prosper loan | 0.002226 |
| Borrower homeownership | 0.009590 | start | 0.002965 | colleg | 0.002505 | you for | 0.002223 |
| Credit Grade D | 0.007955 | behind | 0.002953 | for year | 0.002503 | son | 0.002221 |
| Prior listings | 0.007312 | due | 0.002948 | gas | 0.002469 | pay thi | 0.002218 |
| payday loan | 0.005989 | interest rate | 0.002919 | last | 0.002446 | report | 0.002217 |
| Credit Grade C | 0.005112 | view list | 0.002909 | medic | 0.002440 | paid off | 0.002210 |
| Far West | 0.005093 | lend | 0.002902 | fund | 0.002436 | old | 0.002208 |
| busi | 0.005073 | Spell checker | 0.002831 | what | 0.002431 | list | 0.002200 |
| Middle East | 0.005069 | card debt | 0.002821 | tri | 0.002412 | Rocky Mountain | 0.002183 |
| borrow | 0.004620 | again | 0.002792 | loan and | 0.002404 | even | 0.002171 |
| invest | 0.004574 | Age | 0.002774 | live | 0.002397 | use thi | 0.002169 |
| than | 0.004494 | whi | 0.002758 | they | 0.002394 | god | 0.002164 |
| Debt to income | 0.004327 | them | 0.002754 | mortgag | 0.002374 | compani | 0.002163 |
| # of words in title | 0.004297 | balanc | 0.002734 | pay for | 0.002370 | ha been | 0.002161 |
| % words with 6 or more letters | 0.004277 | with the | 0.002706 | reinvest | 0.002370 | have never | 0.002150 |
| hard | 0.004270 | estat | 0.002705 | who | 0.002368 | the balanc | 0.002148 |
| Race - white | 0.004196 | what you | 0.002687 | and will | 0.002366 | these | 0.002148 |
| thank you | 0.004131 | you are | 0.002673 | real estat | 0.002349 | see | 0.002116 |
| person | 0.004131 | pay back | 0.002654 | into | 0.002346 | the time | 0.002115 |
| payday | 0.004053 | pleas | 0.002644 | more than | 0.002341 | know | 0.002113 |
| # of words in description | 0.003848 | back thi | 0.002618 | just need | 0.002339 | rather | 0.002109 |
| explain | 0.003794 | Race -Afr. American | 0.002569 | purchas | 0.002335 | promis | 0.002103 |
| Gender - male | 0.003756 | score | 0.002556 | total monthli | 0.002334 | hi | 0.002093 |
| save | 0.003476 | Plains Regions | 0.002548 | plan | 0.002328 | support | 0.002090 |
| student | 0.003193 | and the | 0.002537 | husband | 0.002315 | give | 0.002085 |

## **Table A8: Summary statistics of dataset of all loan requests (n = 122,479)**

| Variables | Min | Max | Mean | SD | Freq. |
| --- | --- | --- | --- | --- | --- |
| Amount requested | 1,000 | 25,000 | 7,411.1 | 6,189.4 |  |
| Debt-to-income ratio | 0 | 10.01 | .54 | 1.33 |  |
| Lender interest rate | 0 | .350 | .196 | .092 |  |
| Number of words in description | 1 | 782 | 171.6 | 122.96 |  |
| # Prior Listings | 0 | 67 | 0.90 | 2.06 |  |
| Credit grade: AA |  |  |  |  | 0.026 |
| A |  |  |  |  | 0.034 |
| B |  |  |  |  | 0.055 |
| C |  |  |  |  | 0.105 |
| D |  |  |  |  | 0.160 |
| E |  |  |  |  | 0.181 |
| HR |  |  |  |  | 0.436 |
| Loan status (1 = Funded, 0 = Expired) |  |  |  |  | 0.159 |
| Loan image dummy |  |  |  |  | 0.498 |
| Home owner dummy |  |  |  |  | 0.357 |

## **Table A9a: Bi-grams that appeared frequently in funded loans**

| Bi-gram (funded) | Ratio | Bi-gram (funded) | Ratio | Bi-gram (funded) | Ratio |
| --- | --- | --- | --- | --- | --- |
| reinvest | 4.70 | com | 1.73 | averag | 1.53 |
| relist | 3.36 | below | 1.71 | off with | 1.53 |
| prosper lender | 3.36 | for prosper | 1.71 | add | 1.53 |
| excel credit | 2.54 | lender | 1.71 | review | 1.53 |
| prosper and | 2.51 | consult | 1.70 | remain | 1.53 |
| total expens | 2.47 | post | 1.70 | properti | 1.53 |
| bid | 2.46 | loan thank | 1.69 | list and | 1.52 |
| thi prosper | 2.36 | loan request | 1.69 | entir | 1.52 |
| group | 2.27 | miss payment | 1.68 | expect | 1.52 |
| feel free | 2.24 | fund | 1.67 | cover | 1.52 |
| invest | 2.22 | fulli | 1.67 | than the | 1.51 |
| card balanc | 2.21 | earli | 1.66 | i'll | 1.51 |
| revolv | 2.19 | previou | 1.66 | solid | 1.51 |
| question | 2.17 | www | 1.65 | addit | 1.50 |
| dti | 2.12 | have over | 1.64 | prosper will | 1.50 |
| have excel | 2.11 | public | 1.64 | spend | 1.50 |
| after tax | 2.10 | grade | 1.64 | share | 1.49 |
| verifi | 2.09 | intend | 1.64 | the minimum | 1.49 |
| ani question | 2.08 | and plan | 1.64 | annual | 1.49 |
| lend | 2.07 | can see | 1.63 | base | 1.48 |
| america | 2.04 | prosper payment | 1.62 | your consider | 1.48 |
| from prosper | 2.03 | have never | 1.62 | the cost | 1.48 |
| for consid | 2.03 | develop | 1.62 | never been | 1.48 |
| cash flow | 2.02 | late payment | 1.62 | tax | 1.48 |
| prosper loan | 2.01 | line | 1.62 | price | 1.48 |
| i'd | 1.96 | excel | 1.61 | comput | 1.47 |
| flow | 1.95 | the balanc | 1.61 | request | 1.47 |
| rental | 1.94 | plan pay | 1.61 | capit | 1.47 |
| equiti | 1.92 | monthli incom | 1.61 | paid full | 1.47 |
| cover the | 1.89 | expens are | 1.60 | site | 1.47 |
| bonu | 1.89 | you have | 1.60 | you can | 1.47 |
| origin | 1.87 | see have | 1.60 | avail | 1.47 |
| list | 1.87 | not includ | 1.59 | summer | 1.46 |
| incom after | 1.86 | lower interest | 1.58 | wed | 1.46 |
| misc | 1.82 | delinqu | 1.58 | system | 1.46 |
| answer | 1.81 | the remain | 1.58 | experi | 1.46 |
| record | 1.81 | firm | 1.58 | travel | 1.45 |
| contribut | 1.81 | easili | 1.58 | and thank | 1.45 |
| thank for | 1.80 | figur | 1.57 | cost | 1.45 |
| balanc | 1.80 | approxim | 1.57 | payment thi | 1.45 |
| borrow | 1.79 | side | 1.56 | plan | 1.45 |
| the prosper | 1.79 | usual | 1.56 | for your | 1.45 |
| card with | 1.77 | cash | 1.56 | worth | 1.45 |
| project | 1.77 | commun | 1.56 | minimum payment | 1.44 |
| with prosper | 1.76 | profession | 1.56 | schedul | 1.44 |
| engin | 1.75 | left over | 1.55 | earn | 1.44 |
| default | 1.75 | univers | 1.55 | for view | 1.44 |
| gross | 1.74 | case | 1.54 | student loan | 1.44 |
| never miss | 1.74 | minimum | 1.54 | cell | 1.43 |
| rather | 1.74 | valu | 1.53 | term | 1.43 |
| Bi-gram (funded) | **Ratio** | **Bi-gram (funded)** | **Ratio** | **Bi-gram (funded)** | **Ratio** |
| again for | 1.43 | follow | 1.34 | the amount | 1.28 |
| replac | 1.43 | account and | 1.34 | incom from | 1.28 |
| ratio | 1.42 | salari | 1.34 | toward | 1.28 |
| activ | 1.42 | decid | 1.34 | sale | 1.27 |
| profil | 1.41 | consider | 1.34 | abov | 1.27 |
| save | 1.41 | down the | 1.34 | paid off | 1.27 |
| requir | 1.41 | detail | 1.34 | payment the | 1.27 |
| loan becausei | 1.41 | amount | 1.33 | thank you | 1.27 |
| loan from | 1.41 | june | 1.33 | such | 1.27 |
| gener | 1.41 | the bank | 1.33 | deduct | 1.27 |
| enjoy | 1.41 | graduat | 1.33 | client | 1.27 |
| hello | 1.40 | for take | 1.33 | from the | 1.27 |
| rate and | 1.40 | low | 1.33 | free | 1.27 |
| the first | 1.40 | websit | 1.33 | between | 1.27 |
| lower | 1.40 | loan credit | 1.33 | take the | 1.27 |
| view list | 1.40 | save and | 1.33 | the next | 1.26 |
| number | 1.40 | alreadi | 1.32 | higher interest | 1.26 |
| debt incom | 1.40 | loan with | 1.32 | ga | 1.26 |
| have ani | 1.40 | top prioriti | 1.32 | each | 1.26 |
| been late | 1.39 | off thi | 1.32 | teacher | 1.26 |
| guarante | 1.39 | etc | 1.32 | short | 1.26 |
| first | 1.39 | quickli | 1.32 | less | 1.26 |
| see | 1.39 | your | 1.31 | higher | 1.26 |
| view | 1.39 | than | 1.31 | member | 1.26 |
| you for | 1.39 | paid for | 1.31 | have veri | 1.26 |
| immedi | 1.38 | each month | 1.31 | more than | 1.26 |
| bank | 1.38 | book | 1.31 | extrem | 1.25 |
| profit | 1.38 | combin | 1.31 | account | 1.25 |
| credit histori | 1.38 | includ | 1.31 | use credit | 1.25 |
| student | 1.38 | juli | 1.31 | limit | 1.25 |
| will paid | 1.38 | total | 1.30 | histori | 1.25 |
| have credit | 1.37 | contact | 1.30 | emerg | 1.25 |
| inform | 1.37 | interest rate | 1.30 | offic | 1.25 |
| groceri | 1.37 | never | 1.30 | level | 1.25 |
| car insur | 1.37 | custom | 1.29 | last | 1.25 |
| have alreadi | 1.37 | over year | 1.29 | ani | 1.25 |
| year the | 1.36 | goe | 1.29 | thought | 1.25 |
| one the | 1.36 | pretti | 1.29 | card have | 1.25 |
| wife' | 1.36 | the other | 1.29 | expand | 1.25 |
| payment prosper | 1.36 | electr | 1.29 | strong | 1.24 |
| less than | 1.36 | three year | 1.29 | the end | 1.24 |
| here | 1.35 | larg | 1.29 | charg | 1.24 |
| alway pay | 1.35 | the interest | 1.29 | i'm not | 1.24 |
| citi | 1.35 | automat | 1.29 | teach | 1.24 |
| incom ratio | 1.35 | should | 1.29 | becausei | 1.24 |
| pay down | 1.35 | servic | 1.29 | real estat | 1.24 |
| market | 1.35 | pictur | 1.28 | the follow | 1.24 |
| note | 1.35 | miss | 1.28 | complet | 1.24 |
| cell phone | 1.34 | increas | 1.28 | oper | 1.24 |
| bought | 1.34 | risk | 1.28 | payment will | 1.24 |
| reduc | 1.34 | sourc | 1.28 | late | 1.24 |
| current have | 1.34 | the busi | 1.28 | month that | 1.24 |
| Bi-gram (funded) | **Ratio** | **Bi-gram (funded)** | **Ratio** | **Bi-gram (funded)** | **Ratio** |
| dure the | 1.24 | top | 1.18 | four | 1.14 |
| close | 1.24 | contract | 1.18 | reflect | 1.14 |
| with thi | 1.24 | around | 1.18 | fact | 1.14 |
| locat | 1.24 | everyon | 1.18 | long | 1.14 |
| estat | 1.24 | area | 1.18 | rest | 1.14 |
| local | 1.23 | manag | 1.17 | remov | 1.14 |
| offer | 1.23 | cours | 1.17 | while | 1.14 |
| save for | 1.23 | far | 1.17 | wife and | 1.14 |
| room | 1.23 | over the | 1.17 | the rest | 1.14 |
| actual | 1.23 | the fund | 1.17 | the credit | 1.14 |
| sold | 1.23 | industri | 1.17 | process | 1.14 |
| bit | 1.22 | promot | 1.17 | may | 1.14 |
| half | 1.22 | field | 1.16 | class | 1.14 |
| success | 1.22 | deal | 1.16 | month ago | 1.14 |
| auto | 1.22 | after | 1.16 | well | 1.13 |
| consid | 1.22 | purchas | 1.16 | oblig | 1.13 |
| return | 1.22 | month have | 1.16 | show | 1.13 |
| use for | 1.22 | those | 1.16 | loan which | 1.13 |
| about month | 1.22 | almost year | 1.16 | sinc | 1.13 |
| payment have | 1.22 | the compani | 1.16 | doe not | 1.13 |
| within | 1.21 | use the | 1.16 | approx | 1.13 |
| next | 1.21 | the year | 1.16 | apart | 1.13 |
| i'v | 1.21 | current employ | 1.15 | that the | 1.13 |
| i'v been | 1.21 | your time | 1.15 | month for | 1.13 |
| the monthli | 1.21 | year now | 1.15 | most | 1.12 |
| mean | 1.21 | quit | 1.15 | read | 1.12 |
| prioriti | 1.21 | tuition | 1.15 | stabl job | 1.12 |
| friend | 1.21 | wonder | 1.15 | lesson | 1.12 |
| card debt | 1.21 | period | 1.15 | same | 1.12 |
| next year | 1.21 | continu | 1.15 | appli | 1.12 |
| time everi | 1.21 | licens | 1.15 | time the | 1.12 |
| owner | 1.21 | sell | 1.15 | year have | 1.12 |
| are paid | 1.21 | compani for | 1.15 | further | 1.12 |
| about year | 1.20 | except | 1.15 | debt free | 1.12 |
| the new | 1.20 | compani | 1.15 | the last | 1.12 |
| employe | 1.20 | drive | 1.15 | the time | 1.12 |
| extra | 1.20 | major | 1.15 | expens and | 1.12 |
| leas | 1.20 | benefit | 1.15 | into the | 1.12 |
| per month | 1.20 | been employ | 1.14 | interest credit | 1.12 |
| year with | 1.20 | reason | 1.14 | and i'm | 1.12 |
| per | 1.19 | ad | 1.14 | normal | 1.12 |
| happi | 1.19 | build | 1.14 | finish | 1.12 |
| for over | 1.19 | card that | 1.14 | three | 1.12 |
| thi year | 1.19 | car payment | 1.14 | that thi | 1.11 |
| water | 1.19 | big | 1.14 | seek | 1.11 |
| real | 1.19 | think | 1.14 | dure | 1.11 |
| work the | 1.19 | perfect | 1.14 | posit | 1.11 |
| commit | 1.19 | thi debt | 1.14 | retir | 1.11 |
| veri respons | 1.19 | both | 1.14 | young | 1.11 |
| loan off | 1.19 | off the | 1.14 | everi month | 1.11 |
| grow | 1.19 | two year | 1.14 | august | 1.11 |
| refin | 1.18 | payment for | 1.14 | time have | 1.11 |
| Bi-gram (funded) | **Ratio** | **Bi-gram (funded)** | **Ratio** | **Bi-gram (funded)** | **Ratio** |
| the high | 1.11 | doe | 1.10 | their | 1.10 |
| own | 1.11 | elimin | 1.10 | store | 1.10 |
| unexpect | 1.11 | bill time | 1.10 | two | 1.10 |
| few month | 1.11 | product | 1.10 | for our | 1.10 |
| feel | 1.11 | good credit | 1.10 | prior | 1.10 |
| down | 1.11 | incom and | 1.10 | mortgag | 1.10 |
| within the | 1.11 | last year | 1.10 | coupl | 1.10 |
| result | 1.11 | almost | 1.10 | attend | 1.10 |
| the same | 1.11 | own home | 1.10 | the mortgag | 1.10 |
| possibl | 1.11 |  |  |  |  |

## **Table A9b: Bi-grams that appeared frequently in unfunded loans**

| Bi-gram (unfunded) | Ratio | Bi-gram (unfunded) | Ratio | Bi-gram (unfunded) | Ratio |
| --- | --- | --- | --- | --- | --- |
| situat explain | 4.18 | debt financi | 1.70 | and help | 1.41 |
| loan explain | 4.12 | budget mortgag | 1.68 | god | 1.41 |
| explain what | 3.90 | off all | 1.68 | stress | 1.40 |
| explain whi | 3.88 | help get | 1.67 | like pay | 1.40 |
| whi you | 3.84 | pleas help | 1.67 | that can | 1.40 |
| what you | 3.74 | payment other | 1.63 | get thi | 1.40 |
| for financi | 3.69 | veri hard | 1.63 | son | 1.38 |
| for pay | 3.55 | take care | 1.62 | into one | 1.38 |
| are good | 3.50 | off debt | 1.62 | loan pay | 1.38 |
| explain | 3.49 | hard | 1.62 | afford | 1.38 |
| you are | 3.26 | divorc | 1.62 | back the | 1.38 |
| back thi | 3.09 | mother | 1.60 | money pay | 1.38 |
| catch | 3.06 | need thi | 1.60 | get out | 1.38 |
| you will | 2.58 | medic bill | 1.60 | off credit | 1.37 |
| get back | 2.54 | honest | 1.60 | medic | 1.37 |
| back track | 2.53 | can't | 1.59 | payday | 1.37 |
| pay back | 2.44 | tri | 1.58 | job and | 1.37 |
| loan monthli | 2.35 | good job | 1.57 | loan would | 1.36 |
| someon | 2.29 | and just | 1.56 | the bill | 1.36 |
| loan for | 2.28 | rent insur | 1.55 | loan consolid | 1.36 |
| use thi | 2.27 | need pay | 1.51 | expens total | 1.36 |
| behind | 2.26 | and need | 1.51 | child support | 1.36 |
| chanc | 2.24 | clean | 1.5 | help pay | 1.35 |
| just need | 2.21 | can get | 1.5 | got | 1.35 |
| whi | 2.21 | ahead | 1.49 | have had | 1.35 |
| off some | 2.01 | children | 1.48 | famili | 1.35 |
| tri get | 1.97 | thing | 1.48 | better | 1.34 |
| worker | 1.97 | prove | 1.48 | have learn | 1.34 |
| one payment | 1.97 | surgeri | 1.48 | rebuild credit | 1.34 |
| loan need | 1.90 | everyth | 1.47 | mistak | 1.34 |
| track | 1.89 | mom | 1.47 | given | 1.33 |
| bill and | 1.86 | kid | 1.46 | singl | 1.33 |
| need help | 1.84 | mortgag rent | 1.45 | our credit | 1.33 |
| what | 1.79 | daughter | 1.45 | and want | 1.32 |
| lost | 1.78 | and had | 1.44 | debt that | 1.32 |
| bad | 1.77 | rebuild | 1.44 | clear | 1.32 |
| dont | 1.73 | want pay | 1.43 | went | 1.32 |
| and start | 1.73 | work hard | 1.43 | child | 1.32 |
| payday loan | 1.73 | can pay | 1.43 | debt and | 1.32 |
| and get | 1.71 | hard work | 1.41 | abl pay | 1.32 |
| when wa | 1.31 | and wa | 1.23 | car and | 1.17 |

| Bi-gram (unfunded) | Ratio | Bi-gram (unfunded) | Ratio | Bi-gram (unfunded) | Ratio |
| --- | --- | --- | --- | --- | --- |

| life | 1.30 | loan back | 1.23 | not have | 1.16 |
| --- | --- | --- | --- | --- | --- |
| give | 1.30 | realli | 1.23 | issu | 1.16 |
| help out | 1.29 | ask for | 1.23 | them | 1.16 |
| will abl | 1.29 | work and | 1.23 | could | 1.16 |
| care | 1.29 | all credit | 1.22 | the past | 1.16 |
| all debt | 1.29 | stand | 1.22 | have steadi | 1.16 |
| and now | 1.29 | use help | 1.22 | will make | 1.16 |
| and can | 1.28 | situat have | 1.22 | consolid credit | 1.16 |
| difficult | 1.28 | and make | 1.22 | year | 1.15 |
| paycheck | 1.28 | monthli budget | 1.21 | off high | 1.15 |
| will help | 1.28 | have made | 1.21 | month monthli | 1.15 |
| pay them | 1.28 | truck | 1.21 | would like | 1.15 |
| consolid | 1.28 | year monthli | 1.21 | she | 1.15 |
| turn | 1.27 | husband and | 1.20 | loan financi | 1.14 |
| hospit | 1.27 | improv credit | 1.20 | the best | 1.14 |
| start | 1.27 | him | 1.20 | sever | 1.14 |
| help with | 1.27 | pass | 1.20 | assist | 1.14 |
| seem | 1.27 | happen | 1.20 | job for | 1.14 |
| past | 1.27 | due | 1.20 | file | 1.14 |
| know that | 1.26 | father | 1.20 | and would | 1.14 |
| husband | 1.26 | myself | 1.20 | will pay | 1.13 |
| outstand | 1.26 | time job | 1.20 | and credit | 1.13 |
| caus | 1.26 | problem | 1.19 | her | 1.13 |
| want | 1.26 | have some | 1.19 | ga util | 1.13 |
| dream | 1.25 | all the | 1.19 | that have | 1.13 |
| right now | 1.25 | now and | 1.19 | say | 1.13 |
| but have | 1.25 | the opportun | 1.19 | loan payment | 1.13 |
| off and | 1.24 | and that | 1.18 | school and | 1.13 |
| know | 1.24 | becaus the | 1.18 | look for | 1.13 |
| job with | 1.24 | and work | 1.18 | find | 1.13 |
| decis | 1.24 | now have | 1.18 | all our | 1.13 |
| have one | 1.24 | old | 1.18 | and also | 1.13 |
| the purpos | 1.24 | repair | 1.17 | meet | 1.13 |
| some credit | 1.24 | live with | 1.17 | someth | 1.12 |
| work full | 1.24 | and pay | 1.17 | god bless | 1.12 |
| that are | 1.24 | bring | 1.17 | pay bill | 1.12 |
| that need | 1.23 | need the | 1.17 | card financi | 1.12 |
| all bill | 1.23 | gone | 1.17 | hi | 1.12 |
| bless | 1.23 | greatli | 1.17 | payoff | 1.12 |

| Bi-gram (unfunded) | Ratio | Bi-gram (unfunded) | Ratio | Bi-gram (unfunded) | Ratio |
| --- | --- | --- | --- | --- | --- |
| credit score | 1.12 | would have | 1.11 | let | 1.11 |
| order | 1.12 | onc | 1.11 | money and | 1.10 |
| work with | 1.12 | becom | 1.11 | and not | 1.10 |
| money for | 1.12 | obtain | 1.11 | loan have | 1.10 |
| direct | 1.12 | until | 1.11 | steadi | 1.10 |
| unfortun | 1.12 | taken | 1.11 | and take | 1.10 |
| pleas | 1.11 | and then | 1.11 | vehicl | 1.10 |
| that would | 1.11 | won't | 1.11 | loan the | 1.10 |
| incur | 1.11 | credit score | 1.12 | week | 1.10 |
| pay all | 1.11 | score | 1.11 |  |  |

## **Table A10: lists of words with the highest relevance measure for each LDA topic**

| **Topic: Employment**  **and School** | **Relevance** | **Topic: Interest Rate Reduction** | **Relevance** | **Topic: Expense Explanation** | **Relevance** |
| --- | --- | --- | --- | --- | --- |
| work | -0.42678 | debt | 1.12548 | expens | 0.97497 |
| job | -0.42930 | interest | 0.98818 | explain | 0.79611 |
| full | -0.86215 | rate | 0.95097 | cloth | 0.77201 |
| school | -0.89078 | high | 0.93643 | entertain | 0.75424 |
| year | -1.07493 | consolid | 0.87551 | cabl | 0.75197 |
| colleg | -1.09435 | score | 0.86722 | whi | 0.70915 |
| incom | -1.14446 | improv | 0.74883 | util | 0.70817 |
| employ | -1.14622 | lower | 0.69804 | insur | 0.60867 |
| student | -1.21860 | balanc | 0.66615 | monthli | 0.39539 |
| part | -1.30739 | card | 0.64182 | cardsmi | 0.18691 |
| financi | -1.33920 | histori | 0.62272 | purpos | 0.17408 |
| steadi | -1.44914 | higher | 0.61019 | billsmi | 0.15935 |
| stabl | -1.46063 | payoff | 0.59608 | hous | 0.15739 |
| graduat | -1.48860 | reduc | 0.53922 | debtmi | 0.10787 |
| loan | -1.50922 | elimin | 0.52508 | monthmonthli | 0.06338 |
| secur | -1.53972 | minimum | 0.51484 | timemonthli | -0.00063 |
| degre | -1.56564 | outstand | 0.51241 | situat | -0.00922 |
| monthli | -1.58314 | low | 0.50942 | incomemonthli | -0.02425 |
| educ | -1.59005 | rid | 0.50788 | iam | -0.02954 |
| hour | -1.60727 | ratio | 0.50312 | loansmi | -0.04908 |
| retir | -1.62923 | goal | 0.46530 | card | -0.06722 |
| finish | -1.63329 | revolv | 0.44719 | loanmi | -0.06818 |
| veri | -1.63949 | refin | 0.43334 | paymentmi | -0.08156 |
| start | -1.65941 | incur | 0.39694 | businessmi | -0.09741 |
| repair | -1.68777 | oblig | 0.37474 | consolidationmi | -0.10197 |
| thi | -1.70717 | default | 0.36558 | loanmonthli | -0.11064 |
| wed | -1.73917 | faster | 0.34038 | debtsmi | -0.12716 |
| summer | -1.76588 | sooner | 0.32769 | incom | -0.15812 |
| career | -1.78935 | miss | 0.32551 | yearsmonthli | -0.16602 |
| buy | -1.79148 | apr | 0.31495 | cardmi | -0.16639 |

| **Topic: Business and Real Estate** | **Relevance** | **Topic: Family** | **Relevance** | **Topic: Loan Details and Explanations** | **Relevance** | **Topic: Monthly Payment** | **Relevance** |
| --- | --- | --- | --- | --- | --- | --- | --- |
| busi | -0.72468 | bill | -0.80362 | loan | 0.02223 | month | -0.46588 |
| purchas | -1.22119 | tri | -0.97478 | thi | -0.23886 | payment | -0.62683 |
| compani | -1.24243 | famili | -1.06365 | becaus | -0.39797 | paid | -0.82288 |
| invest | -1.45524 | life | -1.13109 | candid | -0.47236 | total | -1.03183 |
| fund | -1.49916 | husband | -1.19515 | situat | -0.91190 | account | -1.03609 |
| addit | -1.51557 | medic | -1.21212 | financi | -0.92870 | rent | -1.04262 |
| properti | -1.55064 | thing | -1.29017 | purpos | -0.93624 | mortgag | -1.06368 |
| market | -1.56694 | littl | -1.34994 | hous | -0.98446 | save | -1.14949 |
| build | -1.57312 | realli | -1.35012 | expens | -1.11843 | list | -1.23411 |
| cost | -1.61591 | care | -1.37252 | monthli | -1.12610 | everi | -1.27680 |
| sell | -1.62173 | give | -1.38193 | incom | -1.55843 | payday | -1.29964 |
| servic | -1.62783 | children | -1.41594 | entertain | -1.84658 | budget | -1.32913 |
| sale | -1.64196 | hard | -1.43166 | cloth | -1.90259 | report | -1.33987 |
| real | -1.71844 | daughter | -1.44836 | cabl | -1.92371 | bank | -1.36469 |
| alreadi | -1.74378 | chanc | -1.45170 | util | -1.95598 | tax | -1.39207 |
| success | -1.77930 | son | -1.46681 | insur | -2.02035 | includ | -1.42280 |
| open | -1.77941 | money | -1.50048 | bill | -2.17176 | current | -1.43029 |
| provid | -1.78311 | divorc | -1.52915 | card | -2.20032 | amount | -1.48126 |
| base | -1.79599 | move | -1.54901 | canid | -2.73682 | check | -1.51827 |
| home | -1.82519 | track | -1.55675 | ontim | -3.59224 | delinqu | -1.55218 |
| estat | -1.83556 | everyth | -1.55791 | honest | -3.98226 | amp | -1.55378 |
| profit | -1.85000 | abl | -1.57058 | thanksmonthli | -4.09312 | onli | -1.55612 |
| grow | -1.86056 | bad | -1.57478 | alway | -4.30764 | day | -1.60811 |
| offic | -1.87716 | mother | -1.58898 | vacat | -4.30948 | left | -1.60841 |
| run | -1.88103 | home | -1.63274 | buy | -4.83280 | sinc | -1.69568 |
| product | -1.88769 | child | -1.64554 | payback | -4.97132 | bankruptci | -1.69810 |
| store | -1.89849 | kid | -1.67359 | trustworthi | -5.35212 | fee | -1.72871 |
| rental | -1.90456 | put | -1.67912 | fix | -5.43237 | auto | -1.74107 |
| industri | -1.91004 | pleas | -1.68211 | catch | -6.89838 | owe | -1.75320 |
| area | -1.92412 | live | -1.68560 | track | -7.09870 | rebuild | -1.76605 |
|  |  |  |  |  |  |  |  |

## **Figure A1: Distribution of default likelihood for funded and rejected loans**


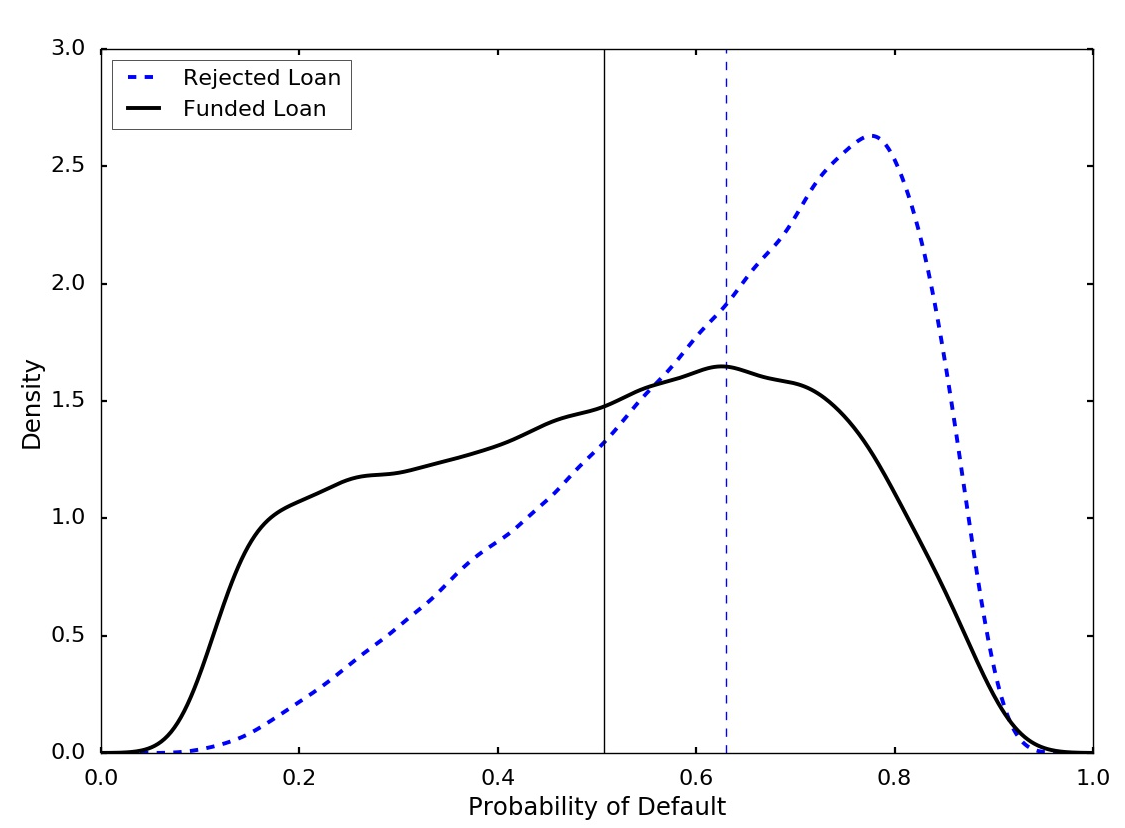


Note: the vertical lines are the average default probabilities.

## **Figure A2: LDA analysis – selecting the number of topics based on perplexity**


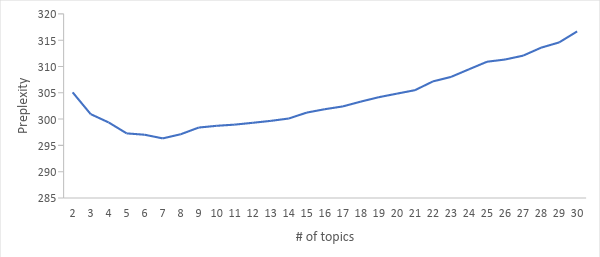


Note: we measure perplexity as: , where is the log-likelihood of the test data documents. Thus, perplexity is decreasing in likelihood (lower perplexity means better fit).

1. Because agreement across coders for age was lower, we also tested a model without this variable. Excluding the age variable did not qualitatively affect our results. [↑](#footnote-ref-1)
